# Supplementary material for: Improved oxide-ion conductivity of NdBaInO4by Sr doping
Source: Royal Society of Chemistry journal article supplement (doi:10.1039/c5ta01336d), 2015-01-01
Supplement: c5ta01336d1.pdf [file c5ta01336d1.pdf]

## Supplementary Information

### Improved oxide-ion conductivity of $\text{NdBaInO}_4$ by Sr doping

Kotaro Fujii,<sup>a</sup> Masahiro Shiraiwa,<sup>a</sup> Yuichi Esaki,<sup>b</sup> Masatomo Yashima,<sup>a,\*</sup> Su Jae Kim,<sup>c</sup> Seongsu Lee<sup>c</sup>

<sup>a</sup> Department of Chemistry and Materials Science, Graduate School of Science and Engineering, Tokyo Institute of Technology, 2-12-1-W4-17, O-okayama, Meguro-ku, Tokyo 152-8551, Japan

<sup>b</sup> Department of Chemistry, Graduate School of Science and Engineering, Tokyo Institute of Technology, 2-12-1-W4-17, O-okayama, Meguro-ku, Tokyo 152-8551, Japan

<sup>c</sup> Neutron Science Division, Research Reactor Utilization Department, Korea Atomic Energy Research Institute, 1045 Daedeok-daero, Yuseong-gu, Daejeon, 305-353, Korea

#### A) Rietveld patterns for synchrotron X-ray powder diffraction data (BL19B2 beam line of SPring-8) of $\text{Nd}_{0.9}\text{Sr}_{0.1}\text{BaInO}_{3.95}$

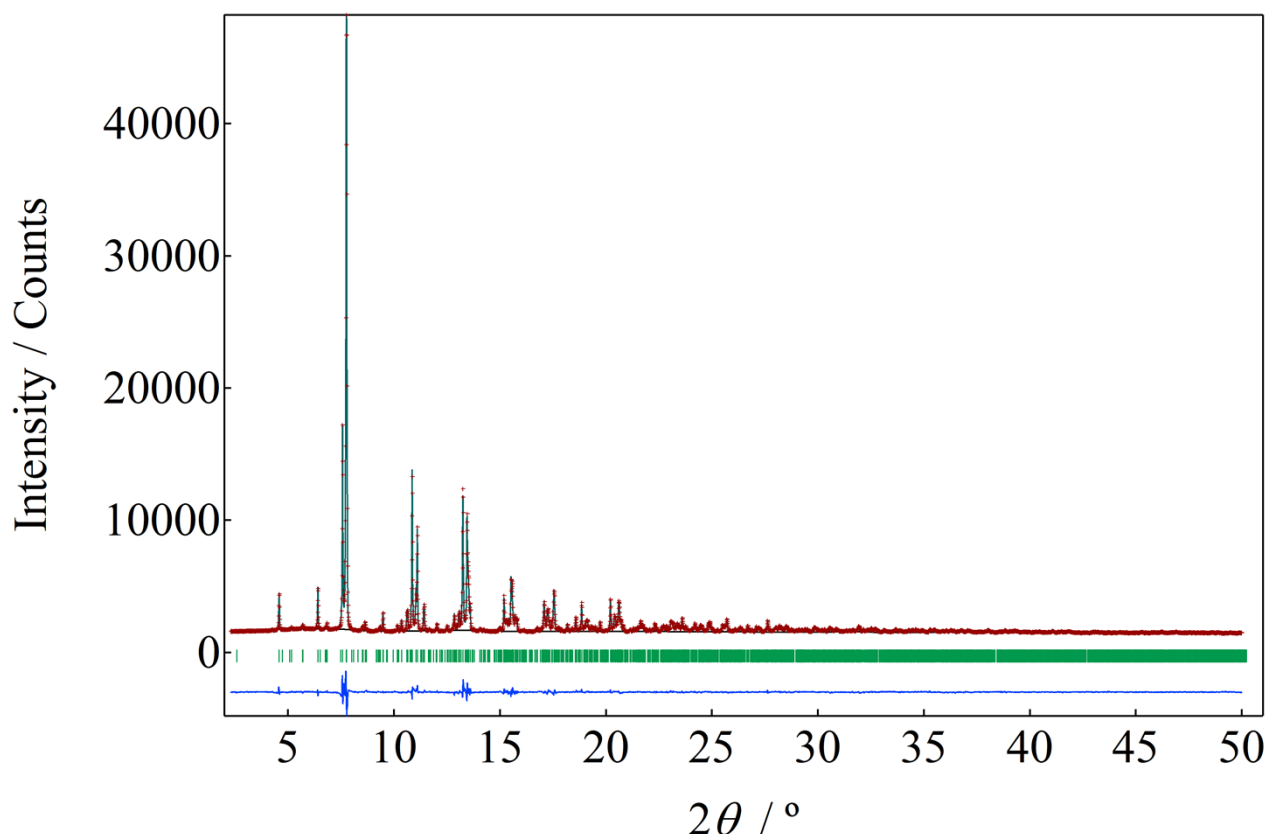

**Figure S3.** Rietveld pattern for synchrotron X-ray powder diffraction (XRPD) data of  $\text{Nd}_{0.9}\text{Sr}_{0.1}\text{BaInO}_{3.95}$  taken at 27 °C showing the experimental (red + marks), calculated (green solid line) and difference (blue lower lines) plots. Green tick marks indicate Bragg peak positions. Synchrotron XRPD measurements were carried out by the Debye-Scherrer camera installed at the beam line BL19B2 of SPring-8 (wavelength = 0.399662(2) Å).

## B) Crystallographic data of Nd<sub>0.9</sub>Sr<sub>0.1</sub>BaInO<sub>3.95</sub>

**Table S1.** Crystallographic data of Nd<sub>0.9</sub>Sr<sub>0.1</sub>BaInO<sub>3.95</sub>.

| Atomic coordinates and atomic displacement parameters of Nd <sub>0.9</sub> Sr <sub>0.1</sub> BaInO <sub>3.95</sub> obtained from the synchrotron X-ray powder diffraction data (BL19B2, SPring-8) measured at 27 °C |      |          |                                     |                                    |                                    |                                         |
|---------------------------------------------------------------------------------------------------------------------------------------------------------------------------------------------------------------------|------|----------|-------------------------------------|------------------------------------|------------------------------------|-----------------------------------------|
| Label                                                                                                                                                                                                               | site | <i>g</i> | <i>x</i>                            | <i>y</i>                           | <i>z</i>                           | <i>U</i> (Å <sup>2</sup> )              |
| Nd                                                                                                                                                                                                                  | 4e   | 0.9      | 0.45225(15)                         | 0.7522(17)                         | 0.1066(3)                          | 0.0048(5)                               |
| Sr                                                                                                                                                                                                                  | 4e   | 0.1      | 0.45225 (= <i>x</i> <sub>Nd</sub> ) | 0.7522 (= <i>y</i> <sub>Nd</sub> ) | 0.1066 (= <i>z</i> <sub>Nd</sub> ) | 0.0048 (= <i>U</i> <sub>Nd</sub> )      |
| Ba                                                                                                                                                                                                                  | 4e   | 1        | 0.14846(18)                         | 0.2476(15)                         | 0.0339(4)                          | 0.0100(5)                               |
| In                                                                                                                                                                                                                  | 4e   | 1        | 0.8318(2)                           | 0.249(3)                           | 0.2050(4)                          | 0.0031(4)                               |
| O1                                                                                                                                                                                                                  | 4e   | 0.9875   | 0.1782(16)                          | 0.797(2)                           | 0.043(4)                           | 0.0200 (= 2× <i>U</i> <sub>Ba</sub> )** |
| O2                                                                                                                                                                                                                  | 4e   | 0.9875   | −0.006(5)                           | 0.022(7)                           | 0.266(5)                           | 0.0200 (= 2× <i>U</i> <sub>Ba</sub> )   |
| O3                                                                                                                                                                                                                  | 4e   | 0.9875   | 0.373(3)                            | 0.500(4)                           | 0.323(4)                           | 0.0200 (= 2× <i>U</i> <sub>Ba</sub> )   |
| O4                                                                                                                                                                                                                  | 4e   | 0.9875   | 0.643(3)                            | 0.454(4)                           | 0.126(3)                           | 0.0200 (= 2× <i>U</i> <sub>Ba</sub> )   |

\* *x*<sub>Nd</sub>, *y*<sub>Nd</sub> and *z*<sub>Nd</sub> stand for the atomic coordinates of Nd atom.

\*\* *U*<sub>*X*</sub> denotes the isotropic atomic displacement parameter of *X* atom.

| Atomic coordinates and displacement parameters of Nd <sub>0.9</sub> Sr <sub>0.1</sub> BaInO <sub>3.95</sub> obtained from the angle dispersive type neutron powder diffraction data (HRPD, HANARO) measured at 800 °C |                                          |                                          |                                          |                                          |                                          |                                          |
|-----------------------------------------------------------------------------------------------------------------------------------------------------------------------------------------------------------------------|------------------------------------------|------------------------------------------|------------------------------------------|------------------------------------------|------------------------------------------|------------------------------------------|
| Label                                                                                                                                                                                                                 | site                                     | <i>g</i>                                 | <i>x</i>                                 | <i>y</i>                                 | <i>z</i>                                 | <i>U</i> (Å <sup>2</sup> )               |
| Nd                                                                                                                                                                                                                    | 4e                                       | 0.9                                      | 0.4524(2)                                | 0.7518 (19)                              | 0.1152 (15)                              | 0.0357 (9)                               |
| Sr                                                                                                                                                                                                                    | 4e                                       | 0.1                                      | 0.4524(= <i>x</i> <sub>Nd</sub> )        | 0.7518 (= <i>y</i> <sub>Nd</sub> )       | 0.1152 (= <i>z</i> <sub>Nd</sub> )       | 0.0357 (= <i>U</i> <sub>Nd</sub> )       |
| Ba                                                                                                                                                                                                                    | 4e                                       | 1                                        | 0.1477(4)                                | 0.253(3)                                 | 0.031(2)                                 | 0.0458(13)                               |
| In                                                                                                                                                                                                                    | 4e                                       | 1                                        | 0.8311(5)                                | 0.242(2)                                 | 0.203(2)                                 | 0.0328(14)                               |
| O1                                                                                                                                                                                                                    | 4e                                       | 0.975                                    | 0.1829(4)                                | 0.758(4)                                 | 0.042(2)                                 | 0.0623 ( <i>U</i> <sub>eq</sub> )**      |
| O2                                                                                                                                                                                                                    | 4e                                       | 0.975                                    | 0.0021(16)                               | 0.011(2)                                 | 0.2613(15)                               | 0.0532(15)                               |
| O3                                                                                                                                                                                                                    | 4e                                       | 0.975                                    | 0.3746(10)                               | 0.521(2)                                 | 0.341(2)                                 | 0.066(3)                                 |
| O4                                                                                                                                                                                                                    | 4e                                       | 0.975                                    | 0.6410(10)                               | 0.491(2)                                 | 0.152(2)                                 | 0.0702 ( <i>U</i> <sub>eq</sub> )        |
| ***                                                                                                                                                                                                                   | <i>U</i> <sub>11</sub> (Å <sup>2</sup> ) | <i>U</i> <sub>22</sub> (Å <sup>2</sup> ) | <i>U</i> <sub>33</sub> (Å <sup>2</sup> ) | <i>U</i> <sub>12</sub> (Å <sup>2</sup> ) | <i>U</i> <sub>13</sub> (Å <sup>2</sup> ) | <i>U</i> <sub>23</sub> (Å <sup>2</sup> ) |
| O1                                                                                                                                                                                                                    | 0.00039(2)                               | 0.00117(4)                               | 0.00037(4)                               | 0.00009(8)                               | 0.00019(8)                               | −0.00016(8)                              |
| O4                                                                                                                                                                                                                    | 0.00048(4)                               | 0.00057(4)                               | 0.00090(7)                               | 0.00033(3)                               | −0.00017(7)                              | 0.00034(8)                               |

\*\* Equivalent isotropic atomic displacement parameter. \*\*\* *U*<sub>*ij*</sub>: Anisotropic atomic displacement parameter.

### C) The site preference of Sr in the $\text{Nd}_{0.9}\text{Sr}_{0.1}\text{BaInO}_{3.95}$

In the preliminary analysis, the site preference of Sr in  $\text{Nd}_{0.9}\text{Sr}_{0.1}\text{BaInO}_{3.95}$  was investigated. There are three sites for the cations (Nd, Ba and In). The refinements based on the time-of-flight neutron diffraction data were carried out using three structure models as shown in Table S2. The model 1 in which the Sr exists at the Nd site gave the best  $R$ -factors.

**Table S2.** Results of the refinements for the three structure models of  $\text{Nd}_{0.9}\text{Sr}_{0.1}\text{BaInO}_{3.95}$

| Site name       | Model 1                                  | Model 2                                  | Model 3                                  |
|-----------------|------------------------------------------|------------------------------------------|------------------------------------------|
| Nd              | $g(\text{Nd}) = 0.9, g(\text{Sr}) = 0.1$ | $g(\text{Nd}) = 0.9, g(\text{Ba}) = 0.1$ | $g(\text{Nd}) = 0.9, g(\text{In}) = 0.1$ |
| Ba              | $g(\text{Ba}) = 1$                       | $g(\text{Ba}) = 0.9, g(\text{Sr}) = 0.1$ | $g(\text{Ba}) = 1$                       |
| In              | $g(\text{In}) = 1$                       | $g(\text{In}) = 1$                       | $g(\text{In}) = 0.9, g(\text{Sr}) = 0.1$ |
| $R$ factors     |                                          |                                          |                                          |
| $R_{\text{wp}}$ | 0.0458                                   | 0.0459                                   | 0.0462                                   |
| $R_{\text{B}}$  | 0.0534                                   | 0.0567                                   | 0.0572                                   |

### D) Definition of the average thermal expansion coefficients

In this paper, the average thermal expansion coefficients between  $T_{\text{min}}$  and  $T_{\text{max}}$  ( $^{\circ}\text{C}$ ) are defined as follow. Here  $x$  is the unit cell parameter  $a$ ,  $b$ ,  $c$  or  $\beta$  and  $V$  is the unit cell volume.

$$\alpha_x = \frac{x_{T_{\text{max}}} - x_{T_{\text{min}}}}{x_{T_{\text{min}}} \times (T_{\text{max}} - T_{\text{min}})}$$

$$\bar{\alpha} = \frac{V_{T_{\text{max}}}^{\frac{1}{3}} - V_{T_{\text{min}}}^{\frac{1}{3}}}{V_{T_{\text{min}}}^{\frac{1}{3}} \times (T_{\text{max}} - T_{\text{min}})}$$

## E) Thermogravimetric analysis and differential thermal analysis

Thermogravimetric analyses (TGA) of  $\text{NdBaInO}_4$  and  $\text{Nd}_{0.9}\text{Sr}_{0.1}\text{BaInO}_{3.95}$  in Ar flow ( $50 \text{ mL min}^{-1}$ ) were carried out using a Bruker-AXS TG-DTA2020SA instrument at the heating and cooling rates of  $10 \text{ }^\circ\text{C min}^{-1}$ . The TG measurements were repeated three times to confirm the reproducibility and to prevent from the influence of the absorbed species such as water. The result is shown in Figure S4.

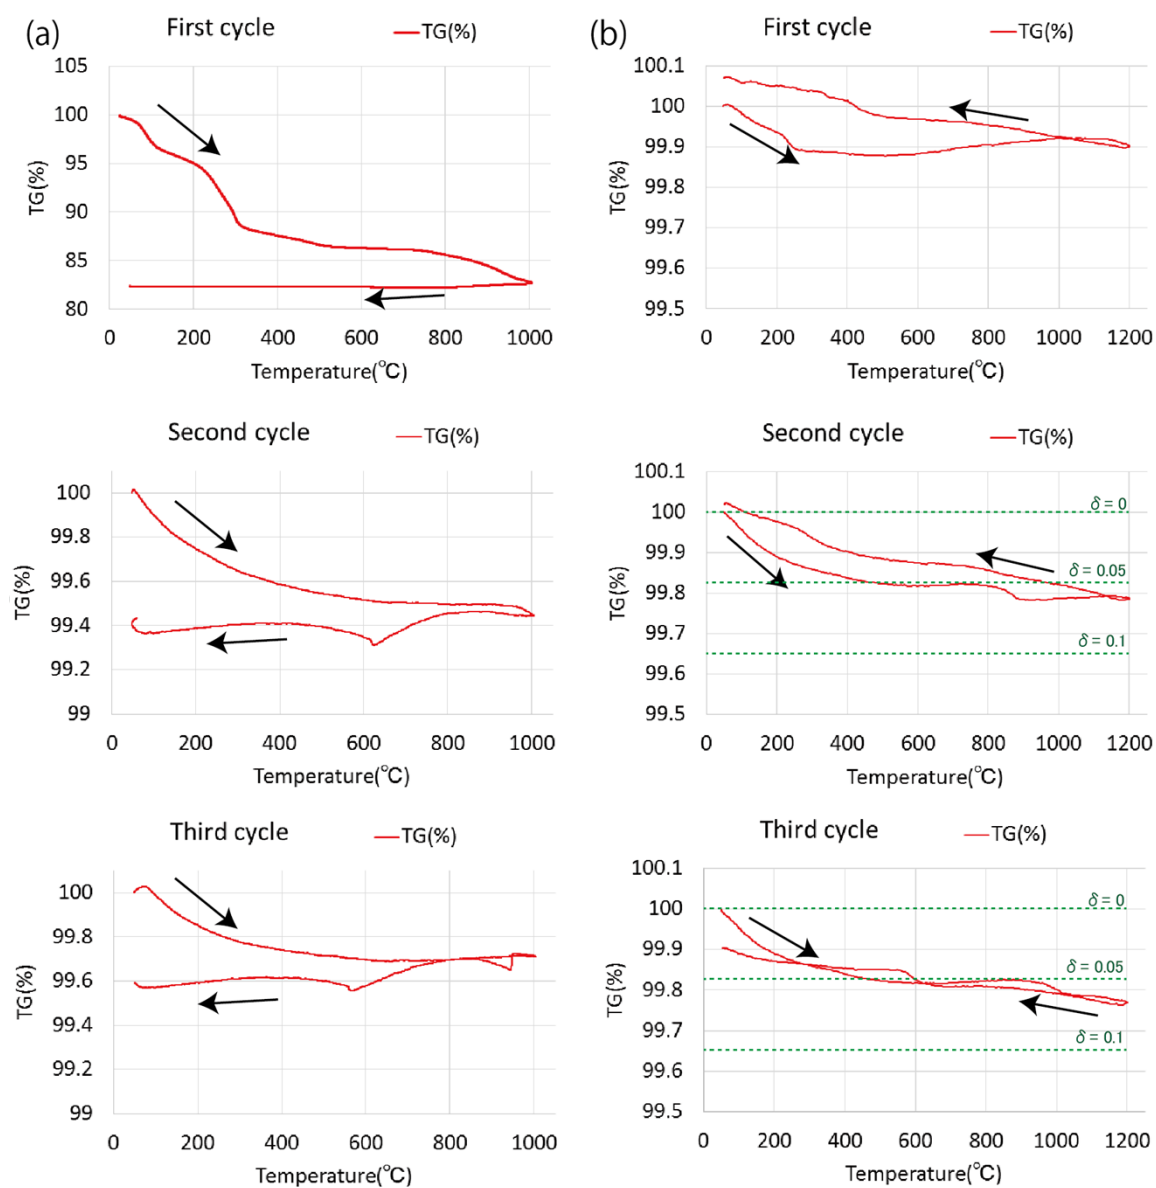

**Figure S4.** Results of the thermogravimetric analysis (TGA; red lines) of (a)  $\text{NdBaInO}_4$  and (b)  $\text{Nd}_{0.9}\text{Sr}_{0.1}\text{BaInO}_{3.95-\delta}$ . The green dash lines indicate the  $\delta$  of  $\text{Nd}_{0.9}\text{Sr}_{0.1}\text{BaInO}_{3.95-\delta}$ .

End of the Supporting Information.
